# Supplementary material for: Growing of Phalaroides arundinacea L. and Bromopsis inermis Leyss for Biofuel Using Sewage Sludge Compost as a Fertilizer
Source: MDPI journal article supplement (doi:10.3390/plants12233939), 2023-11-22
Supplement: s1 [file s1]

## Supplementary Materials

**Table S1.** Soil pH in the experiment of variously fertilized *Bromopsis inermis* Leyss. and *Phalaroides arundinacea* L.

| Fertilizer Rate                                     | Soil pH |      | Difference in pH<br>between 2014 and 2017 |
|-----------------------------------------------------|---------|------|-------------------------------------------|
|                                                     | 2014    | 2017 |                                           |
| <i>Bromopsis inermis</i> Leyss. variety ‘Galinda’   |         |      |                                           |
| Unfertilized                                        | 6.33    | 6.27 | −0.07                                     |
| 75 t/ha SSC DM                                      | 6.20    | 6.60 | 0.40                                      |
| 125 t/ha SSC DM                                     | 6.50    | 6.70 | 0.20                                      |
| <i>Phalaroides arundinacea</i> L. variety ‘Alaušas’ |         |      |                                           |
| Unfertilized                                        | 6.30    | 6.27 | −0.03                                     |
| 75 t/ha SSC DM                                      | 6.47    | 6.67 | 0.20                                      |
| 125 t/ha SSC DM                                     | 6.37    | 6.60 | 0.23                                      |
| F <sub>fact.</sub>                                  |         |      |                                           |
| Factor A                                            | -       | -    | NI                                        |
| Factor B                                            | -       | -    | 5.39 *                                    |
| Interaction A × B                                   | -       | -    | NI                                        |
| LSD <sub>05</sub>                                   |         |      |                                           |
| Species of plants (A)                               | -       | -    | 0.203                                     |
| Fertilization (B)                                   | -       | -    | 0.248                                     |
| Interaction (A × B)                                 | -       | -    | 0.351                                     |

\* represent statistically significant impact of A factor; of B factor or of interaction of A and B factors at the 0.05 probability level. NI – there is no statistically significant impact. LSD<sub>05</sub> – least statistically significant difference between variants of the experiment at the 0.05 probability level ( $n = 3$ ).

**Table S2.** Mobile phosphorus ( $P_2O_5$ ) concentrations in the soil of experiment of variously fertilized *Bromopsis inermis* Leyss. and *Phalaroides arundinacea* L., mg/kg.

| Fertilizer Rate                                     | P <sub>2</sub> O <sub>5</sub> Concentrations of Soil |      | Difference in P <sub>2</sub> O <sub>5</sub> Concentrations between 2014 and 2017 |
|-----------------------------------------------------|------------------------------------------------------|------|----------------------------------------------------------------------------------|
|                                                     | 2014                                                 | 2017 |                                                                                  |
| <i>Bromopsis inermis</i> Leyss. variety ‘Galinda’   |                                                      |      |                                                                                  |
| Unfertilized                                        | 225                                                  | 217  | −8.67                                                                            |
| 75 t/ha SSC DM                                      | 231                                                  | 382  | 151.00                                                                           |
| 125 t/ha SSC DM                                     | 247                                                  | 402  | 155.00                                                                           |
| <i>Phalaroides arundinacea</i> L. variety ‘Alaušas’ |                                                      |      |                                                                                  |
| Unfertilized                                        | 266                                                  | 212  | −54.33                                                                           |
| 75 t/ha SSC DM                                      | 300                                                  | 366  | 66.67                                                                            |
| 125 t/ha SSC DM                                     | 260                                                  | 404  | 144.33                                                                           |
| F <sub>fact.</sub>                                  |                                                      |      |                                                                                  |
| Factor A                                            | -                                                    | -    | 7 *                                                                              |
| Factor B                                            | -                                                    | -    | 38.33 **                                                                         |
| Interaction A × B                                   | -                                                    | -    | NI                                                                               |
| LSD <sub>05</sub>                                   |                                                      |      |                                                                                  |
| Species of plants (A)                               | -                                                    | -    | 39.491                                                                           |
| Fertilization (B)                                   | -                                                    | -    | 48.366                                                                           |
| Interaction (A × B)                                 | -                                                    | -    | 68.4                                                                             |

\* and \*\* represent statistically significant impact of A factor; of B factor or of interaction of A and B factors at the 0.05 and 0.01 probability levels. NI – there is no statistically significant impact. LSD<sub>05</sub> – least statistically significant difference between variants of the experiment at the 0.05 probability level ( $n = 3$ ).

**Table S3.** Mobile potassium (K<sub>2</sub>O) concentrations in the soil of experiment of variously fertilized *Bromopsis inermis* Leyss. and *Phalaroides arundinacea* L., mg/kg.

| Fertilizer Rate                                     | K <sub>2</sub> O Concentrations of Soil |        | Difference in K <sub>2</sub> O Concentrations between 2014 and 2017 |
|-----------------------------------------------------|-----------------------------------------|--------|---------------------------------------------------------------------|
|                                                     | 2014                                    | 2017   |                                                                     |
| <i>Bromopsis inermis</i> Leyss. variety ‘Galinda’   |                                         |        |                                                                     |
| Unfertilized                                        | 138.00                                  | 97.00  | −41.00                                                              |
| 75 t/ha SSC DM                                      | 152.67                                  | 121.67 | −31.00                                                              |
| 125 t/ha SSC DM                                     | 131.33                                  | 126.00 | −5.33                                                               |
| <i>Phalaroides arundinacea</i> L. variety ‘Alaušas’ |                                         |        |                                                                     |
| Unfertilized                                        | 149.33                                  | 95.00  | −54.33                                                              |
| 75 t/ha SSC DM                                      | 145.33                                  | 111.00 | −34.33                                                              |
| 125 t/ha SSC DM                                     | 145.33                                  | 107.67 | −37.67                                                              |
| F <sub>fact.</sub>                                  |                                         |        |                                                                     |
| Factor A                                            | -                                       | -      | NI                                                                  |
| Factor B                                            | -                                       | -      | NI                                                                  |
| Interaction A × B                                   | -                                       | -      | NI                                                                  |
| LSD <sub>05</sub>                                   |                                         |        |                                                                     |
| Species of plants (A)                               | -                                       | -      | 28.464                                                              |
| Fertilization (B)                                   | -                                       | -      | 34.861                                                              |
| Interaction (A × B)                                 | -                                       | -      | 49.301                                                              |

NI – there is no statistically significant impact. LSD<sub>05</sub> – least statistically significant difference between variants of the experiment at the 0.05 probability level ( $n = 3$ ).

**Table S4.** Total nitrogen ( $N_{\text{total}}$ ) concentrations in the soil of experiment of variously fertilized *Bromopsis inermis* Leyss. and *Phalaroides arundinacea* L., %.

| Fertilizer Rate                                     | N <sub>total</sub> Concentrations of Soil |       | Difference in N <sub>total</sub> Concentrations between 2014 and 2017 |
|-----------------------------------------------------|-------------------------------------------|-------|-----------------------------------------------------------------------|
|                                                     | 2014                                      | 2017  |                                                                       |
| <i>Bromopsis inermis</i> Leyss. variety ‘Galinda’   |                                           |       |                                                                       |
| Unfertilized                                        | 0.093                                     | 0.095 | 0.002                                                                 |
| 75 t/ha SSC DM                                      | 0.092                                     | 0.115 | 0.023                                                                 |
| 125 t/ha SSC DM                                     | 0.091                                     | 0.085 | −0.006                                                                |
| <i>Phalaroides arundinacea</i> L. variety ‘Alaušas’ |                                           |       |                                                                       |
| Unfertilized                                        | 0.089                                     | 0.084 | −0.005                                                                |
| 75 t/ha SSC DM                                      | 0.088                                     | 0.102 | 0.014                                                                 |
| 125 t/ha SSC DM                                     | 0.094                                     | 0.101 | 0.007                                                                 |
| F <sub>fact.</sub>                                  |                                           |       |                                                                       |
| Factor A                                            | -                                         | -     | NI                                                                    |
| Factor B                                            | -                                         | -     | NI                                                                    |
| Interaction A × B                                   | -                                         | -     | NI                                                                    |
| LSD <sub>05</sub>                                   |                                           |       |                                                                       |
| Species of plants (A)                               | -                                         | -     | 0.016                                                                 |
| Fertilization (B)                                   | -                                         | -     | 0.02                                                                  |
| Interaction (A × B)                                 | -                                         | -     | 0.028                                                                 |

NI – there is no statistically significant impact.  $LSD_{05}$  – least statistically significant difference between variants of the experiment at the 0.05 probability level ( $n = 3$ ).

**Table S5.** Organic carbon ( $C_{org.}$ ) concentrations in the soil of experiment of variously fertilized *Bromopsis inermis* Leyss. and *Phalaroides arundinacea* L., %.

| Fertilizer Rate                                     | C <sub>org.</sub> Concentrations of Soil |      | Difference in C <sub>org.</sub><br>Concentrations<br>between 2014 and 2017 |
|-----------------------------------------------------|------------------------------------------|------|----------------------------------------------------------------------------|
|                                                     | 2014                                     | 2017 |                                                                            |
| <i>Bromopsis inermis</i> Leyss. variety ‘Galinda’   |                                          |      |                                                                            |
| Unfertilized                                        | 0.91                                     | 0.88 | −0.03                                                                      |
| 75 t/ha SSC DM                                      | 0.87                                     | 1.10 | 0.23                                                                       |
| 125 t/ha SSC DM                                     | 0.82                                     | 0.94 | 0.12                                                                       |
| <i>Phalaroides arundinacea</i> L. variety ‘Alaušas’ |                                          |      |                                                                            |
| Unfertilized                                        | 0.84                                     | 0.86 | 0.02                                                                       |
| 75 t/ha SSC DM                                      | 0.91                                     | 0.86 | −0.05                                                                      |
| 125 t/ha SSC DM                                     | 0.93                                     | 1.02 | 0.09                                                                       |
| F <sub>fact.</sub>                                  |                                          |      |                                                                            |
| Factor A                                            | -                                        | -    | NI                                                                         |
| Factor B                                            | -                                        | -    | NI                                                                         |
| Interaction A × B                                   | -                                        | -    | NI                                                                         |
| LSD <sub>05</sub>                                   |                                          |      |                                                                            |
| Species of plants (A)                               | -                                        | -    | 0.166                                                                      |
| Fertilization (B)                                   | -                                        | -    | 0.203                                                                      |
| Interaction (A × B)                                 | -                                        | -    | 0.287                                                                      |

NI – there is no statistically significant impact. LSD<sub>05</sub> – least statistically significant difference between variants of the experiment at the 0.05 probability level ( $n = 3$ ).

**Table S6.** Copper (Cu) concentrations in the soil of experiment of variously fertilized *Bromopsis inermis* Leyss. and *Phalaroides arundinacea* L., mg/kg.

| Fertilizer Rate                                     | Cu Concentrations of Soil |      | Difference in Cu Concentrations<br>between 2014 and 2017 |
|-----------------------------------------------------|---------------------------|------|----------------------------------------------------------|
|                                                     | 2014                      | 2017 |                                                          |
| <i>Bromopsis inermis</i> Leyss. variety ‘Galinda’   |                           |      |                                                          |
| Unfertilized                                        | 6.47                      | 6.22 | −0.25                                                    |
| 75 t/ha SSC DM                                      | 6.12                      | 8.12 | 2.00                                                     |
| 125 t/ha SSC DM                                     | 6.22                      | 8.53 | 2.31                                                     |
| <i>Phalaroides arundinacea</i> L. variety ‘Alaušas’ |                           |      |                                                          |
| Unfertilized                                        | 6.31                      | 6.01 | −0.30                                                    |
| 75 t/ha SSC DM                                      | 6.00                      | 7.29 | 1.29                                                     |
| 125 t/ha SSC DM                                     | 6.34                      | 8.46 | 2.11                                                     |
| F <sub>fact.</sub>                                  |                           |      |                                                          |
| Factor A                                            | -                         | -    | NI                                                       |
| Factor B                                            | -                         | -    | 9.91 **                                                  |
| Interaction A × B                                   | -                         | -    | NI                                                       |
| LSD <sub>05</sub>                                   |                           |      |                                                          |
| Species of plants (A)                               | -                         | -    | 1.064                                                    |
| Fertilization (B)                                   | -                         | -    | 1.303                                                    |
| Interaction (A × B)                                 | -                         | -    | 1.842                                                    |

\*\* represent statistically significant impact of A factor; of B factor or of interaction of A and B factors at the 0.01 probability level. NI – there is no statistically significant impact. LSD<sub>05</sub> – least statistically significant difference between variants of the experiment at the 0.05 probability level ( $n = 3$ ).

**Table S7.** Zinc (Zn) concentrations in the soil of experiment of variously fertilized *Bromopsis inermis* Leyss. and *Phalaroides arundinacea* L., mg/kg.

| Fertilizer Rate                                     | Zn Concentrations of Soil |       | Difference in Zn Concentrations between 2014 and 2017 |
|-----------------------------------------------------|---------------------------|-------|-------------------------------------------------------|
|                                                     | 2014                      | 2017  |                                                       |
| <i>Bromopsis inermis</i> Leyss. variety ‘Galinda’   |                           |       |                                                       |
| Unfertilized                                        | 21.67                     | 21.23 | −0.43                                                 |
| 75 t/ha SSC DM                                      | 18.40                     | 30.67 | 12.27                                                 |
| 125 t/ha SSC DM                                     | 18.87                     | 30.87 | 12.00                                                 |
| <i>Phalaroides arundinacea</i> L. variety ‘Alaušas’ |                           |       |                                                       |
| Unfertilized                                        | 22.20                     | 21.60 | −0.60                                                 |
| 75 t/ha SSC DM                                      | 18.10                     | 28.00 | 9.90                                                  |
| 125 t/ha SSC DM                                     | 20.17                     | 32.57 | 12.40                                                 |
| F <sub>fact.</sub>                                  |                           |       |                                                       |
| Factor A                                            | -                         | -     | NI                                                    |
| Factor B                                            | -                         | -     | 16.08 **                                              |
| Interaction A × B                                   | -                         | -     | NI                                                    |
| LSD <sub>05</sub>                                   |                           |       |                                                       |
| Species of plants (A)                               | -                         | -     | 4.517                                                 |
| Fertilization (B)                                   | -                         | -     | 5.533                                                 |
| Interaction (A × B)                                 | -                         | -     | 7.824                                                 |

\*\* represent statistically significant impact of A factor; of B factor or of interaction of A and B factors at the 0.01 probability level. NI – there is no statistically significant impact. LSD<sub>05</sub> – least statistically significant difference between variants of the experiment at the 0.05 probability level ( $n = 3$ ).

**Table S8.** Cadmium (Cd) concentrations in the soil of experiment of variously fertilized *Bromopsis inermis* Leyss. and *Phalaroides arundinacea* L., mg/kg.

| Fertilizer Rate                                     | Cd Concentrations of Soil |       | Difference in Cd Concentrations between 2014 and 2017 |
|-----------------------------------------------------|---------------------------|-------|-------------------------------------------------------|
|                                                     | 2014                      | 2017  |                                                       |
| <i>Bromopsis inermis</i> Leyss. variety ‘Galinda’   |                           |       |                                                       |
| Unfertilized                                        | 0.047                     | 0.055 | 0.008                                                 |
| 75 t/ha SSC DM                                      | 0.051                     | 0.086 | 0.035                                                 |
| 125 t/ha SSC DM                                     | 0.052                     | 0.078 | 0.026                                                 |
| <i>Phalaroides arundinacea</i> L. variety ‘Alaušas’ |                           |       |                                                       |
| Unfertilized                                        | 0.057                     | 0.051 | −0.007                                                |
| 75 t/ha SSC DM                                      | 0.059                     | 0.069 | 0.011                                                 |
| 125 t/ha SSC DM                                     | 0.059                     | 0.087 | 0.028                                                 |
| F <sub>fact.</sub>                                  |                           |       |                                                       |
| Factor A                                            | -                         | -     | 7.46 *                                                |
| Factor B                                            | -                         | -     | 13.08 **                                              |
| Interaction A × B                                   | -                         | -     | NI                                                    |
| LSD <sub>05</sub>                                   |                           |       |                                                       |
| Species of plants (A)                               | -                         | -     | 0.01                                                  |
| Fertilization (B)                                   | -                         | -     | 0.012                                                 |
| Interaction (A × B)                                 | -                         | -     | 0.017                                                 |

\* and \*\* represent statistically significant impact of A factor; of B factor or of interaction of A and B factors at the 0.05 and 0.01 probability levels. NI – there is no statistically significant impact. LSD<sub>05</sub> – least statistically significant difference between variants of the experiment at the 0.05 probability level ( $n = 3$ ).



**Table S9.** Chromium (Cr) concentrations in the soil of experiment of variously fertilized *Bromopsis inermis* Leyss. and *Phalaroides arundinacea* L., mg/kg.

| Fertilizer Rate                                     | Cr Concentrations of Soil |       | Difference in Cr Concentrations between 2014 and 2017 |
|-----------------------------------------------------|---------------------------|-------|-------------------------------------------------------|
|                                                     | 2014                      | 2017  |                                                       |
| <i>Bromopsis inermis</i> Leyss. variety ‘Galinda’   |                           |       |                                                       |
| Unfertilized                                        | 10.53                     | 9.61  | −0.92                                                 |
| 75 t/ha SSC DM                                      | 8.48                      | 9.99  | 1.51                                                  |
| 125 t/ha SSC DM                                     | 9.13                      | 9.60  | 0.47                                                  |
| <i>Phalaroides arundinacea</i> L. variety ‘Alaušas’ |                           |       |                                                       |
| Unfertilized                                        | 9.56                      | 9.54  | −0.01                                                 |
| 75 t/ha SSC DM                                      | 7.70                      | 10.03 | 2.34                                                  |
| 125 t/ha SSC DM                                     | 9.64                      | 10.53 | 0.89                                                  |
| F <sub>fact.</sub>                                  |                           |       |                                                       |
| Factor A                                            | -                         | -     | NI                                                    |
| Factor B                                            | -                         | -     | NI                                                    |
| Interaction A × B                                   | -                         | -     | NI                                                    |
| LSD <sub>05</sub>                                   |                           |       |                                                       |
| Species of plants (A)                               | -                         | -     | 2.066                                                 |
| Fertilization (B)                                   | -                         | -     | 2.53                                                  |
| Interaction (A × B)                                 | -                         | -     | 3.578                                                 |

NI – there is no statistically significant impact. LSD<sub>05</sub> – least statistically significant difference between variants of the experiment at the 0.05 probability level ( $n = 3$ ).

**Table S10.** Lead (Pb) concentrations in the soil of experiment of variously fertilized *Bromopsis inermis* Leyss. and *Phalaroides arundinacea* L., mg/kg.

| Fertilizer Rate                                     | Pb Concentrations of Soil |      | Difference in Pb Concentrations between 2014 and 2017 |
|-----------------------------------------------------|---------------------------|------|-------------------------------------------------------|
|                                                     | 2014                      | 2017 |                                                       |
| <i>Bromopsis inermis</i> Leyss. variety ‘Galinda’   |                           |      |                                                       |
| Unfertilized                                        | 7.74                      | 8.90 | 1.16                                                  |
| 75 t/ha SSC DM                                      | 7.79                      | 8.69 | 0.90                                                  |
| 125 t/ha SSC DM                                     | 7.96                      | 8.70 | 0.73                                                  |
| <i>Phalaroides arundinacea</i> L. variety ‘Alaušas’ |                           |      |                                                       |
| Unfertilized                                        | 7.97                      | 8.35 | 0.39                                                  |
| 75 t/ha SSC DM                                      | 7.92                      | 8.30 | 0.38                                                  |
| 125 t/ha SSC DM                                     | 8.13                      | 9.19 | 1.06                                                  |
| F <sub>fact.</sub>                                  |                           |      |                                                       |
| Factor A                                            | -                         | -    | NI                                                    |
| Factor B                                            | -                         | -    | NI                                                    |
| Interaction A × B                                   | -                         | -    | NI                                                    |
| LSD <sub>05</sub>                                   |                           |      |                                                       |
| Species of plants (A)                               | -                         | -    | 0.844                                                 |
| Fertilization (B)                                   | -                         | -    | 1.034                                                 |
| Interaction (A × B)                                 | -                         | -    | 1.462                                                 |

NI – there is no statistically significant impact. LSD<sub>05</sub> – least statistically significant difference between variants of the experiment at the 0.05 probability level ( $n = 3$ ).

**Table S11.** Nickel (Ni) concentrations in the soil of experiment of variously fertilized *Bromopsis inermis* Leyss. and *Phalaroides arundinacea* L., mg/kg.

| Fertilizer Rate                                     | Ni Concentrations of Soil |      | Difference in Ni Concentrations between 2014 and 2017 |
|-----------------------------------------------------|---------------------------|------|-------------------------------------------------------|
|                                                     | 2014                      | 2017 |                                                       |
| <i>Bromopsis inermis</i> Leyss. variety ‘Galinda’   |                           |      |                                                       |
| Unfertilized                                        | 7.29                      | 7.07 | −0.22                                                 |
| 75 t/ha SSC DM                                      | 5.90                      | 7.13 | 1.23                                                  |
| 125 t/ha SSC DM                                     | 6.58                      | 7.28 | 0.70                                                  |
| <i>Phalaroides arundinacea</i> L. variety ‘Alaušas’ |                           |      |                                                       |
| Unfertilized                                        | 6.64                      | 6.92 | 0.28                                                  |
| 75 t/ha SSC DM                                      | 5.90                      | 7.05 | 1.15                                                  |
| 125 t/ha SSC DM                                     | 6.75                      | 7.24 | 0.49                                                  |
| F <sub>fact.</sub>                                  |                           |      |                                                       |
| Factor A                                            | -                         | -    | NI                                                    |
| Factor B                                            | -                         | -    | NI                                                    |
| Interaction A × B                                   | -                         | -    | NI                                                    |
| LSD <sub>05</sub>                                   |                           |      |                                                       |
| Species of plants (A)                               | -                         | -    | 1.227                                                 |
| Fertilization (B)                                   | -                         | -    | 1.502                                                 |
| Interaction (A × B)                                 | -                         | -    | 2.125                                                 |

NI – there is no statistically significant impact. LSD<sub>05</sub> – least statistically significant difference between variants of the experiment at the 0.05 probability level ( $n = 3$ ).
